# Supplementary material
Source: Springer Nature journal article supplement (https://www.springermedizin.de/resource/supplementary/13550_2012_132_MOESM8_ESM.pdf/9687654)

# Max COM Displacement vs Counts (n=84)

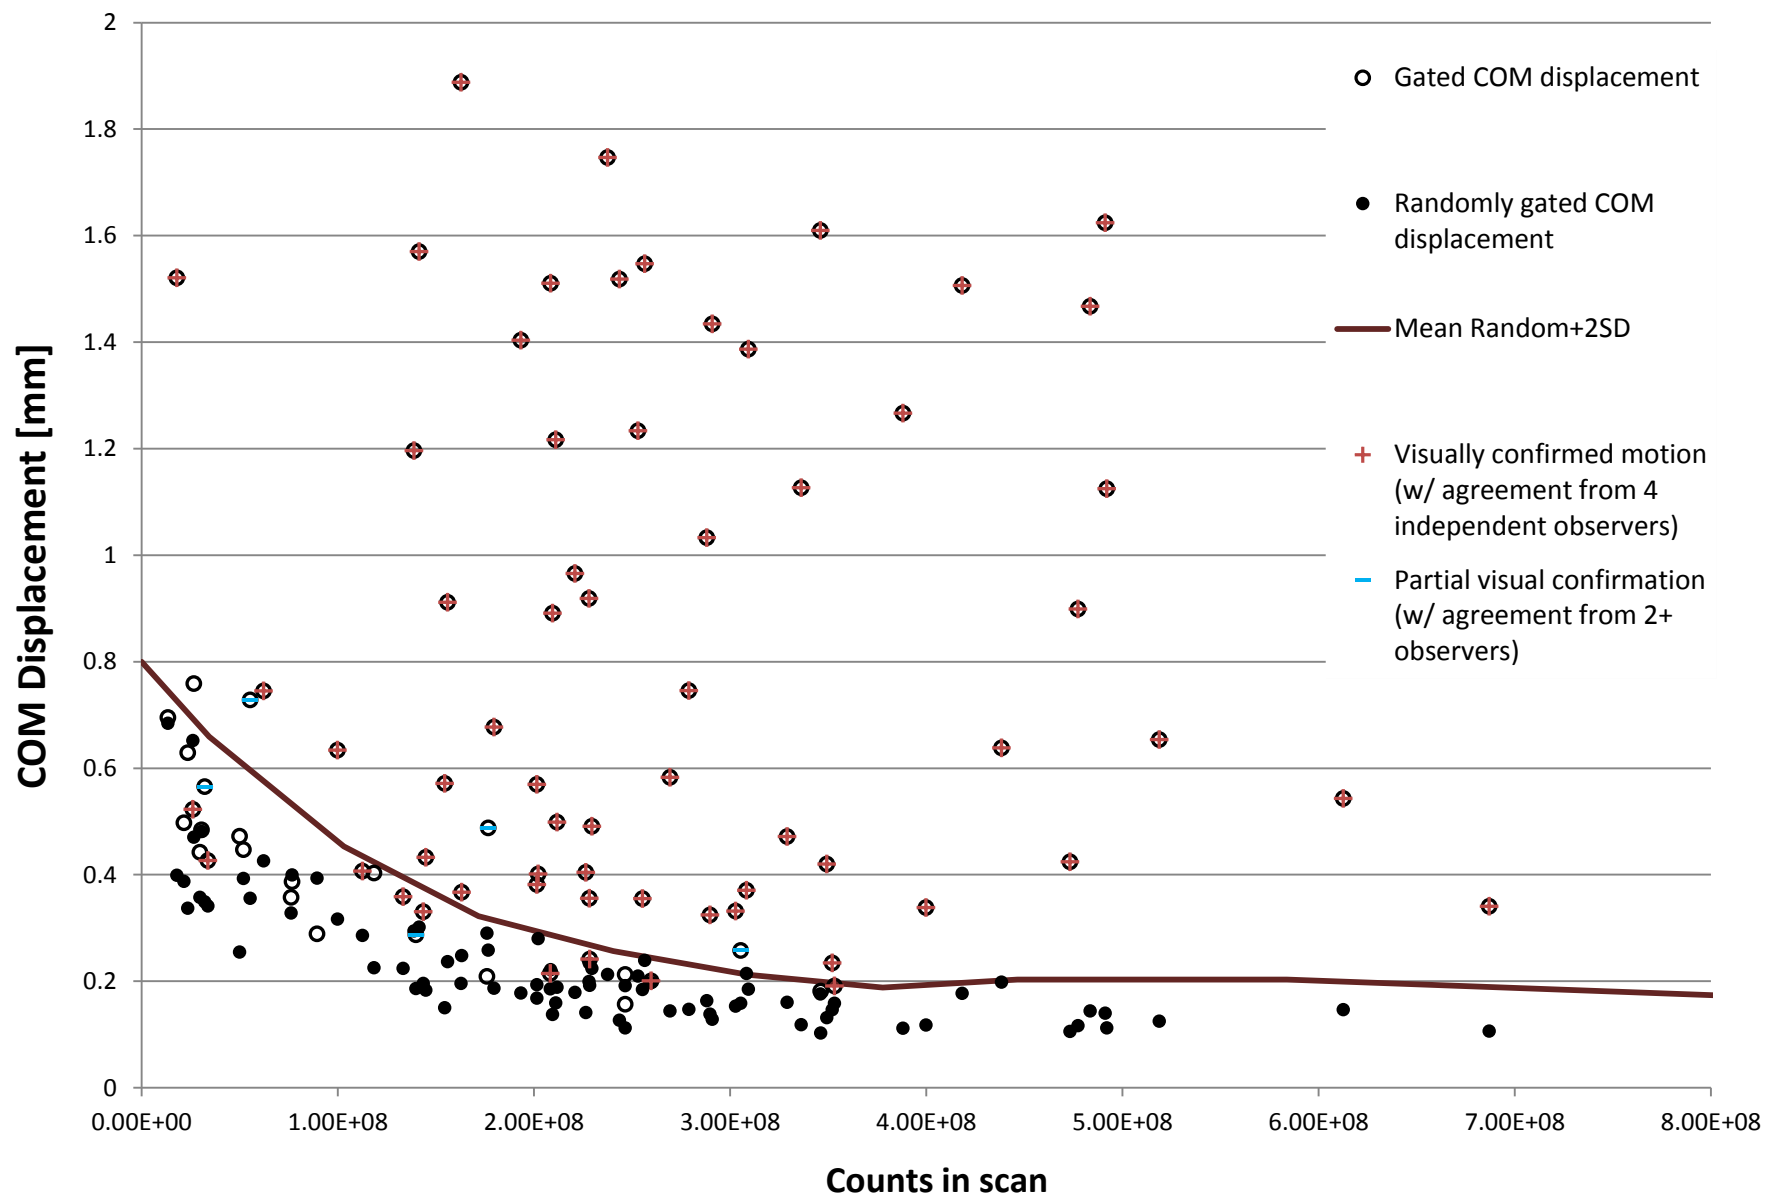

Supplement: MOESM8 [file 9687654]
